# Supplementary material for: Zooplankton Community Profiling in a Eutrophic Freshwater Ecosystem-Lake Tai Basin by DNA Metabarcoding
Source: PubMed Central journal article supplement (PMC5431808; doi:10.1038/s41598-017-01808-y), 2017-05-11
Supplement: 41598_2017_1808_MOESM1_ESM.pdf [file 41598_2017_1808_MOESM1_ESM.pdf]

Zooplankton Community Profiling in a Eutrophic Freshwater Ecosystem-  
Lake Tai Basin by DNA Metabarcoding

Jianghua Yang<sup>\*</sup>, Xiaowei Zhang<sup>\*</sup>, Yuwei Xie<sup>\*</sup>, Chao Song<sup>\*</sup>, Yong Zhang<sup>†</sup>, Hongxia Yu<sup>\*</sup>,  
G. Allen Burton<sup>§</sup>

<sup>\*</sup> State Key Laboratory of Pollution Control and Resource Reuse, School of the Environment, Nanjing University, Nanjing, Jiangsu 210023, China

<sup>†</sup> Jiangsu Environmental Monitoring Center, Nanjing, Jiangsu, 210000, China

<sup>§</sup> School of Natural Resources and Environment, University of Michigan, Ann Arbor, Michigan, USA

**Corresponding author: Xiaowei Zhang**

School of the Environment, Nanjing University

163 Xianlin Avenue, Nanjing, 210023, China

Tel: (86)-25-89680623

*E-mail address:* howard50003250@yahoo.com  
zhangxw@nju.edu.cn

This file includes:

**Table S1.** Latitude/Longitude and group information for each sampling site.

**Table S2.** The body length of each zooplankton species. The zooplankton specimen was stored in 100% alcohol. The body size was measured by microscope.

**Table S3.** The GenBank accession numbers of local reference database.

**Fig.S1.** Samples and methods used in the study and components of eukaryotic plankton biodiversity of the entire mtCO1 metabarcoding data set.

**Fig.S2.** The observed species/OTUs with the depth of sequencing.

**Fig.S3.** The comparisons of metabarcoding data with traditional monitoring data.

**Fig.S4.** Number of barcode sequences (CO1) in Genbank and local database of the missing species in metabarcoding data.

**Fig.S5.** The novel OTUs clusters/taxa found by metabarcoding method.

**Fig.S6.** The comparison results between zooplankton density, inferred biomass and the NGS reads number.

**Fig.S7.** The comparison results between zooplankton inferred biomass and the NGS reads number.

**Table S1.** Latitude/Longitude and group information for each sampling site.

| Site | Name      | longitude | latitude | Type      | Sampling Time |
|------|-----------|-----------|----------|-----------|---------------|
| S1   | TH.ZSHN.3 | 120.0364  | 31.3731  | Tai Lake  | 13.25         |
| S2   | TH.ZS.3   | 120.2675  | 31.0136  | Tai Lake  | 10.24         |
| S3   | TH.XWL.3  | 120.2294  | 31.5014  | Tai Lake  | 14.4          |
| S4   | TH.XTG.3  | 119.9947  | 31.035   | Tai Lake  | 12            |
| S5   | TH.XSX.3  | 120.1495  | 31.14045 | Tai Lake  | 15            |
| S6   | TH.XMK.3  | 120.1023  | 30.9697  | Tai Lake  | 8.11          |
| S7   | TH.XHX.3  | 120.4     | 31.1717  | Tai Lake  | 12.52         |
| S8   | TH.XHN.3  | 120.4213  | 31.11528 | Tai Lake  | 14.4          |
| S9   | TH.WGS.3  | 120.229   | 31.3103  | Tai Lake  | 10.15         |
| S10  | TH.TS.3   | 120.1622  | 31.3919  | Tai Lake  | 11.06         |
| S11  | TH.SZ.3   | 120.2158  | 31.3992  | Tai Lake  | 11.25         |
| S12  | TH.STG.3  | 120.0375  | 31.43394 | Tai Lake  | 11.28         |
| S13  | TH.SHDB.3 | 120.1506  | 31.0628  | Tai Lake  | 11.09         |
| S14  | TH.SDG.3  | 120.4017  | 31.4422  | Tai Lake  | 13.26         |
| S15  | TH.QD.3   | 120.3811  | 30.9578  | Tai Lake  | 11.35         |
| S16  | TH.PZ.3   | 120.453   | 31.1858  | Tai Lake  | 15.3          |
| S17  | TH.PTS.3  | 120.1033  | 31.2258  | Tai Lake  | 13.34         |
| S18  | TH.MS.3   | 120.2811  | 31.2639  | Tai Lake  | 10.26         |
| S19  | TH.MG.3   | 120.461   | 31.0017  | Tai Lake  | 12.39         |
| S20  | TH.LJK.3  | 120.1468  | 31.49854 | Tai Lake  | 15.2          |
| S21  | TH.JSG.3  | 120.3608  | 31.3843  | Tai Lake  | 12.3          |
| S22  | TH.HX.3   | 120.2071  | 31.22508 | Tai Lake  | 14.09         |
| S23  | TH.DXTT.3 | 120.3433  | 31.08567 | Tai Lake  | 14            |
| S24  | TH.DTH.3  | 120.5067  | 31.07146 | Tai Lake  | 10.37         |
| S25  | TH.DPK.3  | 119.9381  | 31.3089  | Tai Lake  | 11.2          |
| S26  | TH.DLS.3  | 120.0119  | 31.1364  | Tai Lake  | 12.36         |
| S27  | TH.BDK.3  | 120.0447  | 31.47545 | Tai Lake  | 14.44         |
| S28  | SK.LZ.3   | 119.3006  | 31.59891 | Reservoir | 13            |
| S29  | SK.LTSK.3 | 119.3823  | 32.06801 | Reservoir | 11.07         |
| S30  | RE.ZX.3   | 119.3601  | 31.9388  | River     | 12.07         |
| S31  | RE.ZJQ.3  | 120.1626  | 31.87749 | River     |               |
| S32  | RE.ZGDQ.3 | 120.721   | 31.71582 | River     | 9.5           |
| S33  | RE.YLQ.3  | 121.0469  | 31.50611 | River     | 8.2           |
| S34  | RE.XFZ.3  | 119.5672  | 32.05335 | River     | 11            |
| S35  | RE.WMQ.3  | 119.947   | 31.57431 | River     | 13.52         |
| S36  | RE.TPZ.3  | 120.54    | 31.008   | River     | 12.21         |
| S37  | RE.TBQ.3  | 119.9801  | 31.87529 | River     |               |
| S38  | RE.SP.3   | 121.0678  | 31.2713  | River     | 11.55         |
| S39  | RE.ML.3   | 120.9266  | 31.60219 | River     | 10.36         |
| S40  | RE.LLDQ.3 | 121.1917  | 31.46734 | River     | 13.35         |
| S41  | RE.JX.3   | 119.4227  | 31.8625  | River     | 11.12         |

---

|     |            |          |          |            |       |
|-----|------------|----------|----------|------------|-------|
| S42 | RE.JLZ.3   | 120.874  | 31.3144  | River      | 10.43 |
| S43 | RE.JB.3    | 120.845  | 31.017   | River      | 11.02 |
| S44 | RE.HSQ2.3  | 120.3817 | 31.30113 | River      | 11.45 |
| S45 | RE.HNQ.3   | 119.6028 | 31.83278 | River      | 14.4  |
| S46 | RE.HLJ.3   | 120.1456 | 31.67362 | River      | 10.4  |
| S47 | RE.HHDQQ.3 | 119.9565 | 31.46926 | River      | 10.42 |
| S48 | RE.HGZ.3   | 120.471  | 31.228   | River      | 14.41 |
| S49 | RE.GJK.3   | 120.659  | 31.2     | River      | 9.15  |
| S50 | RE.FQD.3   | 121.1121 | 31.58811 | River      | 9     |
| S51 | RE.DZDQ.3  | 120.5528 | 31.57972 | River      | 11.03 |
| S52 | RE.DPQ.3   | 119.924  | 31.97396 | River      | 11.08 |
| S53 | RE.BQ.3    | 119.4615 | 31.55857 | River      | 15.45 |
| S54 | RE.BGDQ.3  | 120.5455 | 31.78323 | River      | 8.23  |
| S55 | HD.YD.3    | 120.8693 | 31.07007 | Small lake | 14.15 |
| S56 | HD.YCZHB.3 | 120.8057 | 31.47272 | Small lake | 13.51 |
| S57 | HD.YCXHN.3 | 120.7169 | 31.41228 | Small lake | 10.4  |
| S58 | HD.YCDHN.3 | 120.8308 | 31.40869 | Small lake | 9.32  |
| S59 | HD.XJDT.3  | 119.8823 | 31.53864 | Small lake | 11.08 |
| S60 | HD.KLH.3   | 120.8604 | 31.40769 | Small lake | 13.51 |
| S61 | HD.KCH.3   | 120.7436 | 31.58195 | Small lake | 15.2  |
| S62 | HD.GD1.3   | 119.756  | 31.49916 | Small lake | 10.15 |
| S63 | HD.EZD.3   | 120.5696 | 31.51263 | Small lake | 11.39 |
| S64 | HD.DHG.3   | 119.8734 | 31.63365 | Small lake | 13.56 |
| S65 | HD.CHN.3   | 120.8119 | 31.1973  | Small lake | 12    |
| S66 | HD.CHD.3   | 120.8544 | 31.22309 | Small lake | 11.17 |
| S67 | HD.BGHK.3  | 119.7743 | 31.57859 | Small lake | 13.12 |
| S68 | HD.GD2.3   | 119.5936 | 31.6084  | Small lake | 10.15 |
| S69 | RE.SHQ.3   | 120.2417 | 31.73556 | River      |       |

---

**Table S2.** The body length of each zooplankton species. The zooplankton specimen was stored in 100% alcohol. The body size was measured by microscope.

| Category  | Species                           | Mean        | SD          |
|-----------|-----------------------------------|-------------|-------------|
| Copepod   | <i>copepod nauplius*</i>          | 218.29      | 83.42445804 |
| Cladocera | <i>Bosmina</i> sp                 | 341.3370833 | 65.65381948 |
| Copepod   | <i>Cyclops</i> larve              | 723.548     | 125.333     |
| Copepod   | <i>Calanoida</i> larve            | 806.532     | 145.658     |
| Copepod   | <i>Schmackeria forbesi</i>        | 997.5571795 | 167.6123453 |
| Copepod   | <i>Sinocalanus dorrii</i>         | 1275.261622 | 140.0464081 |
| Rotifer   | <i>Keratella cochlearis</i>       | 103.3071429 | 35.09603888 |
| Rotifer   | <i>Keratella valga</i>            | 121.3336842 | 20.90828151 |
| Rotifer   | <i>Polyarthra trigla</i>          | 142.5       | #N/A        |
| Rotifer   | <i>Keratella quadrata</i>         | 137.081875  | 20.70169799 |
| Rotifer   | <i>Asplachna</i> sp               | 527.356     | 173.9459051 |
| Rotifer   | <i>Brachionus angularis</i>       | 130.5391304 | 33.13801085 |
| Rotifer   | <i>Keratella ticinensis</i>       | 105         | #N/A        |
| Rotifer   | <i>Brachionus calyciflorus</i>    | 258.0832353 | 61.44659551 |
| Rotifer   | <i>Filinia longisela</i>          | 176.6085185 | 112.8875276 |
| Rotifer   | <i>Synchaeta oblonga</i>          | 195.6326316 | 36.78925384 |
| Rotifer   | <i>Polyarthra dolichoptera</i>    | 142.5       | #N/A        |
| Cladocera | <i>Ceriodaphnia cornuta</i>       | 333.899     | 74.83487996 |
| Rotifer   | <i>Conochilus unicornis</i>       | 102.04      | NA          |
| Cladocera | <i>Chydornus</i> sp               | 257.633     | 53.02383626 |
| Cladocera | <i>Bosminopsis deitersi</i>       | 343.4125    | 125.0807986 |
| Cladocera | <i>Chydornus sphaericus</i>       | 298.8061765 | 133.0538081 |
| Copepod   | <i>Schmackeria inopinus</i>       | 1171.148889 | 135.8830439 |
| Rotifer   | <i>Euchlanis dilalata</i>         | 293.08      | 49.78065411 |
| Cladocera | <i>Alona guttata</i>              | 263.8511111 | 54.08922592 |
| Rotifer   | <i>Brachionus caudatus</i>        | 177.424878  | 62.29242001 |
| Rotifer   | <i>Brachionus urceus</i>          | 164.64      | 37.25949901 |
| Rotifer   | <i>Ponpholyx sulcata</i>          | 125         | #N/A        |
| Cladocera | <i>Pleuroxus trigonellus</i>      | 433.0514286 | 251.1988491 |
| Cladocera | <i>Cyclops vicinus</i>            | 1706.4875   | 242.5272825 |
| Copepod   | <i>Mesocyclops</i> sp             | 1035.468636 | 280.8249261 |
| Rotifer   | <i>Brachionus quadridentatus</i>  | 164.1738462 | 34.07200447 |
| Rotifer   | <i>Notommata</i> sp               | 120         | #N/A        |
| Copepod   | <i>Thermocyclops taihokuensis</i> | 1042.5445   | 79.01903831 |
| Cladocera | <i>Moina micrura</i>              | 587.5685333 | 162.8728833 |
| Rotifer   | <i>Rotaria neptunia</i>           | 453.7607692 | 122.2475159 |
| Cladocera | <i>Sida crystallina</i>           | 881.549375  | 462.1178685 |
| Cladocera | <i>Alona eximia</i>               | 334.585     | 38.84137549 |
| Cladocera | <i>Camptocercus rectirostris</i>  | 629.74125   | 72.78557597 |
| Rotifer   | <i>Brachionus leydigii</i>        | 187.8675    | 29.97819529 |

|           |                                    |             |             |
|-----------|------------------------------------|-------------|-------------|
| Rotifer   | <i>Gastropus stylifer</i>          | 164.195     | 64.42748762 |
| Copepod   | <i>Eucyclops serrulatus</i>        | 902.8       | 143.8485695 |
| Rotifer   | <i>Lecane bulla</i>                | 126.674     | 35.81979816 |
| Copepod   | <i>Eucyclops speratus</i>          | 1160        | #N/A        |
| Rotifer   | <i>Testudinella patina</i>         | 176.012     | 20.40394006 |
| Rotifer   | <i>Polyarthra euryptera</i>        | 150         | #N/A        |
| Copepod   | <i>Schmackeria</i> sp              | 1094.595625 | 208.784569  |
| Rotifer   | <i>Polyarthra</i> sp.              | 130         | #N/A        |
| Rotifer   | <i>Ploesoma hudsoni</i>            | 328.5396875 | 125.2843559 |
| Rotifer   | <i>Lecane lunaris</i>              | 110         | #N/A        |
| Rotifer   | <i>Lepadella patella</i>           | 130         | #N/A        |
| Rotifer   | <i>Trichotria tetractis</i>        | 78.15       | NA          |
| Cladocera | <i>Simocephalus vetulus</i>        | 825.7209091 | 223.0956126 |
| Rotifer   | <i>Brachionus diversicornis</i>    | 238.5962    | 36.61595302 |
| Cladocera | <i>Scapholeberis mucronata</i>     | 356.425     | 1.534421715 |
| Rotifer   | <i>Lecane buna</i>                 | 123.0092308 | 18.0483464  |
| Rotifer   | <i>Conochilus dossuarius</i>       | 164.9624324 | 62.36578284 |
| Rotifer   | <i>Trichocerca longiseta</i>       | 275.66125   | 34.70184245 |
| Rotifer   | <i>Trichocerca stylata</i>         | 144.202     | 44.08772301 |
| Copepod   | <i>Thermocyclops brevifurcatus</i> | 870.7681818 | 194.4547521 |
| Cladocera | <i>Graptoleberis testudinaria</i>  | 402.3771429 | 68.5444709  |
| Cladocera | <i>Daphnia galeata</i>             | 970.9763158 | 292.5898683 |
| Cladocera | <i>Alona diaphana</i>              | 278.6485714 | 48.70432063 |
| Copepod   | <i>Harpacticoida</i> sp            | 634.7078947 | 118.1325138 |
| Cladocera | <i>Diaphanosoma dubium</i>         | 927.536     | 151.7031014 |
| Copepod   | <i>Microcyclops varicans</i>       | 808.9966667 | 98.32272694 |
| Cladocera | <i>Pleuroxus laevis</i>            | 391.555     | 13.80979544 |
| Cladocera | <i>Ilyocryptus sordidus</i>        | 335.0875    | 231.5703712 |
| Cladocera | <i>Diaphanosoma orghidani</i>      | 629.5741176 | 121.1526597 |

\* copepod nauplius means the larvae of copepod which cannot be identified by morphological characters

**Table S3.** The GenBank accession numbers of local reference database.

| Species                          | Genbank  | Species                           | Genbank  |
|----------------------------------|----------|-----------------------------------|----------|
| <i>Alona diaphana</i>            | KY091149 | <i>Gastropus stylifer</i>         | KY091190 |
| <i>Alona eximia</i>              | KY091150 | <i>Graptoleberis testudinaria</i> | KY091191 |
| <i>Alona guttata</i>             | KY091151 | <i>Harpacticoida</i> sp           | KY091192 |
| <i>Alona rectangular</i>         | KY091152 | <i>Ilyocryptus sordidus</i>       | KY091193 |
| <i>Alona</i> sp                  | KY091153 | <i>Keratella cochlearis</i>       | KY091194 |
| <i>Asplanchna priodonta</i>      | KY091154 | <i>Keratella quadrata</i>         | KY091195 |
| <i>Asplanchna</i> sp             | KY091155 | <i>Keratella</i> sp               | KY091196 |
| <i>Asplanchna girodi</i>         | KY091156 | <i>Keratella valga</i>            | KY091197 |
| <i>Bosmina</i> sp                | KY091157 | <i>Lecane bulla</i>               | KY091198 |
| <i>Bosminopsis deitersi</i>      | KY091158 | <i>Lecane ungulata</i>            | KY091199 |
| <i>Brachionus angularis</i>      | KY091159 | <i>Limnoithona sinensis</i>       | KY091200 |
| <i>Brachionus calyciflorus</i>   | KY091160 | <i>Macrothrix</i> sp              | KY091201 |
| <i>Brachionus caudatus</i>       | KY091161 | <i>Mesocyclops</i> sp             | KY091202 |
| <i>Brachionus diversicornis</i>  | KY091162 | <i>Microcyclops varicans</i>      | KY091203 |
| <i>Brachionus falcatus</i>       | KY091163 | <i>Moina brachiata</i>            | KY091204 |
| <i>Brachionus forficula</i>      | KY091164 | <i>Moina micrura</i>              | KY091205 |
| <i>Brachionus quadridentatus</i> | KY091165 | <i>Moina rectirostris</i>         | KY091206 |
| <i>Brachionus urceus</i>         | KY091166 | <i>Mytilina ventralis</i>         | KY091207 |
| <i>Brachionus leydigi</i>        | KY091167 | <i>Neodiaptomus schmackeri</i>    | KY091208 |
| <i>Camptocercus rectirostris</i> | KY091168 | <i>Notommatidae</i> sp            | KY091209 |
| <i>Ceriodaphnia cornuta</i>      | KY091169 | <i>Pleuroxus aduncus</i>          | KY091210 |
| <i>Ceriodaphnia quadrangula</i>  | KY091170 | <i>Pleuroxus laevis</i>           | KY091211 |
| <i>Chydorus</i> sp               | KY091171 | <i>Pleuroxus trigonellus</i>      | KY091212 |
| <i>Chydorus sphaericus</i>       | KY091172 | <i>Ploesoma hudsoni</i>           | KY091213 |
| <i>Conochiloides dossuarius</i>  | KY091173 | <i>Rotifer</i> sp                 | KY091214 |
| <i>Conochilus unicornis</i>      | KY091174 | <i>Scapholeberis mucronata</i>    | KY091215 |
| <i>Cyclop</i> sp                 | KY091175 | <i>Schmackeria forbesi</i>        | KY091216 |
| <i>Cyclops vicinus</i>           | KY091176 | <i>Schmackeria inopinus</i>       | KY091217 |
| <i>Daphnia galeata</i>           | KY091177 | <i>Schmackeria</i> sp             | KY091218 |
| <i>Daphnia pulex</i>             | KY091178 | <i>Sida crystallina</i>           | KY091219 |
| <i>Daphnia</i> sp                | KY091179 | <i>Simocephalus vetuloides</i>    | KY091220 |
| <i>Diaphanosoma dubium</i>       | KY091180 | <i>Simocephalus vetulus</i>       | KY091221 |
| <i>Diaphanosoma orghidani</i>    | KY091181 | <i>Sinocalanus dorrii</i>         | KY091222 |
| <i>Diaphanosoma</i> sp           | KY091182 | <i>Synchaeta</i> sp               | KY091223 |
| <i>Diaptomidae</i> sp            | KY091183 | <i>Synchaeta oblonga</i>          | KY091224 |
| <i>Disparalona rostrata</i>      | KY091184 | <i>Testudinella patina</i>        | KY091225 |
| <i>Dunhevedia crassa</i>         | KY091185 | <i>Thermocyclops</i> sp           | KY091226 |
| <i>Eodiaptomus sinensis</i>      | KY091186 | <i>Thermocyclops taihokuensis</i> | KY091227 |
| <i>Euchlanis dilalata</i>        | KY091187 | <i>Trichocerca elongata</i>       | KY091228 |
| <i>Eucyclops serrulatus</i>      | KY091188 | <i>Trichocerca</i> sp             | KY091229 |
| <i>Filinia longiseta</i>         | KY091189 | <i>Trichocerca stylata</i>        | KY091230 |

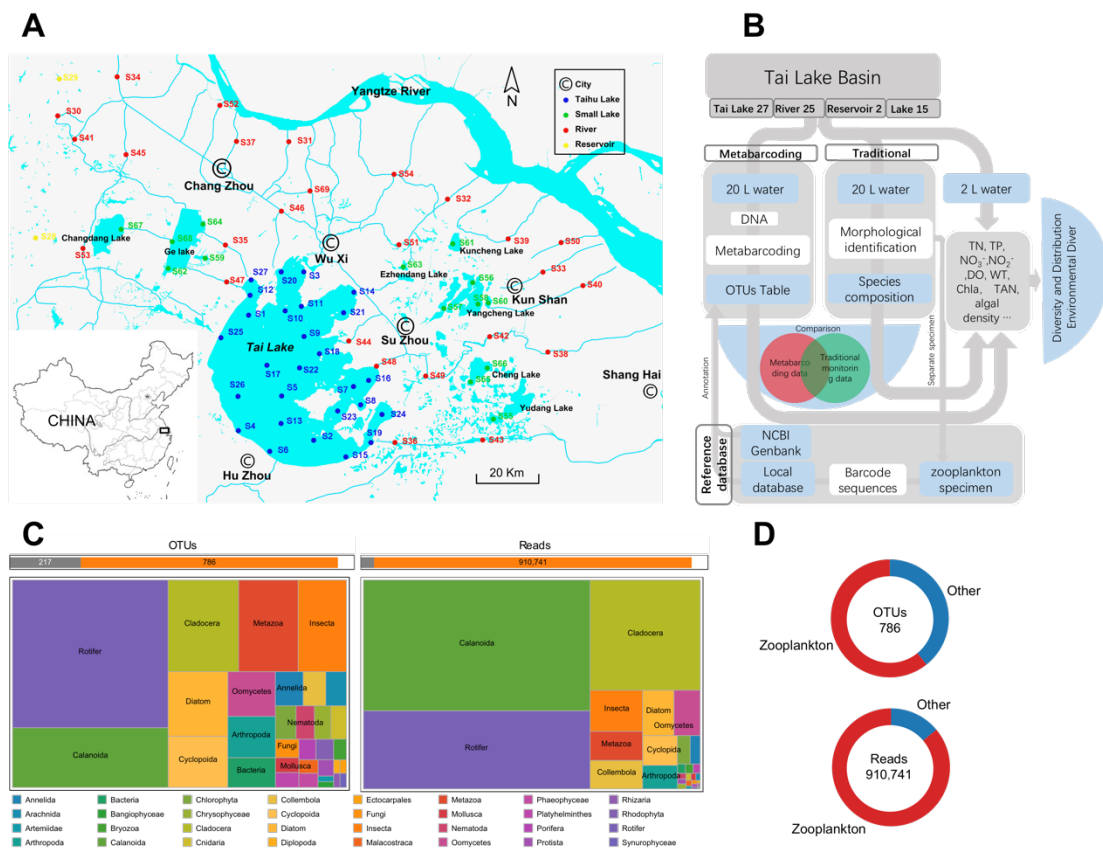

Fig.S1. Samples and methods used in the study and components of eukaryotic plankton biodiversity of the entire mtCO1 metabarcoding data set. (A) Location of sampling sites of the Tai Lake basin of Jiangsu province in China. Sampling sites were grouped into four categories according to the type of water body: 1) Tai Lake, 2) Reservoir, 3) River and 4) Lake. Here, “Lake” means all the relatively smaller lakes around Tai Lake. The map was made by ArcGIS version 10.0 (ESRI Company, USA). (B) Flowchart of methods used in the study. Ion torrent PGM-based sequencing was performed on each sample targeting the CO1 gene region. (C): Components of eukaryotic plankton community of the entire mtCO1 metabarcoding data set. Barcodes were “unassigned” when the maximum sequence similarity to a reference sequence was < 80% and posterior probability > 60% in SAP or match to the “environmental invertebrate sample” in the NCBI database. Diagrams display richness of OTUs (left) and relative abundances of reads (right) of various eukaryotic groups. (D): The pie plot displays the proportion of zooplankton sequences and OTUs in the assigned data.



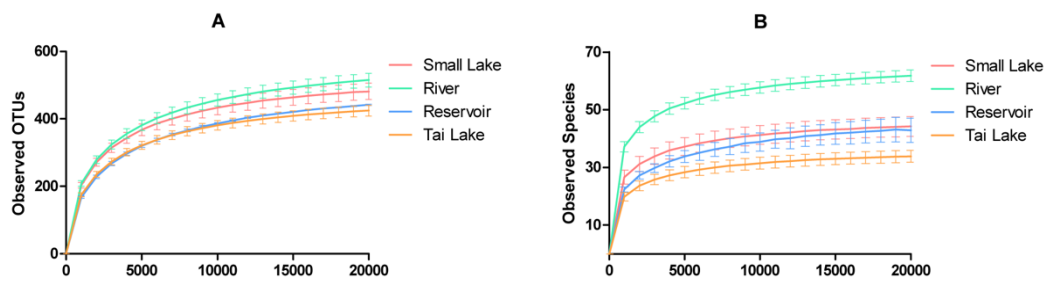

Fig.S2. The observed species/OTUs with the depth of sequencing. (A) number of observed OTUs; (B) number of observed species.

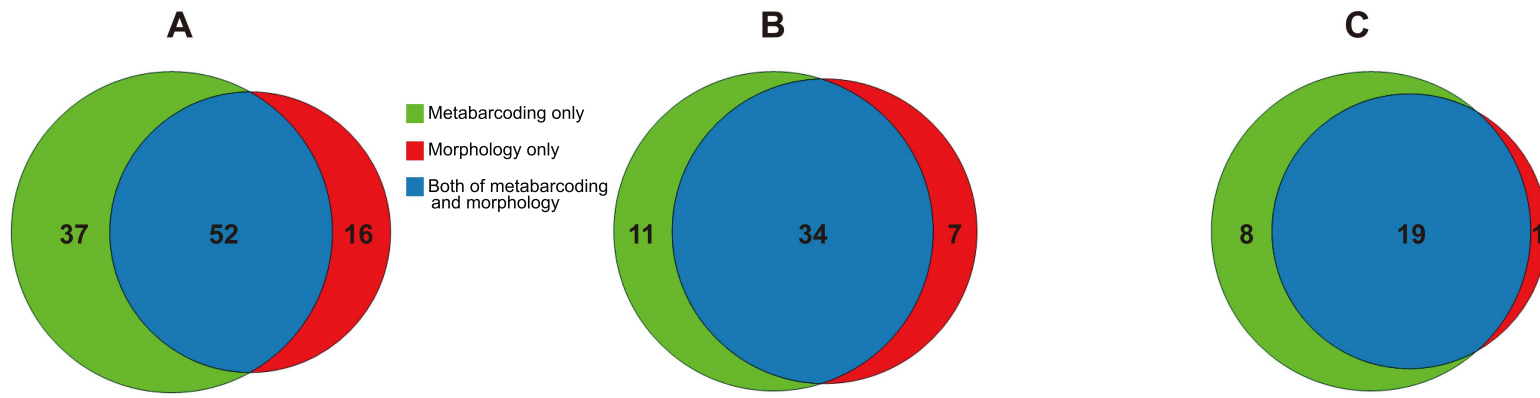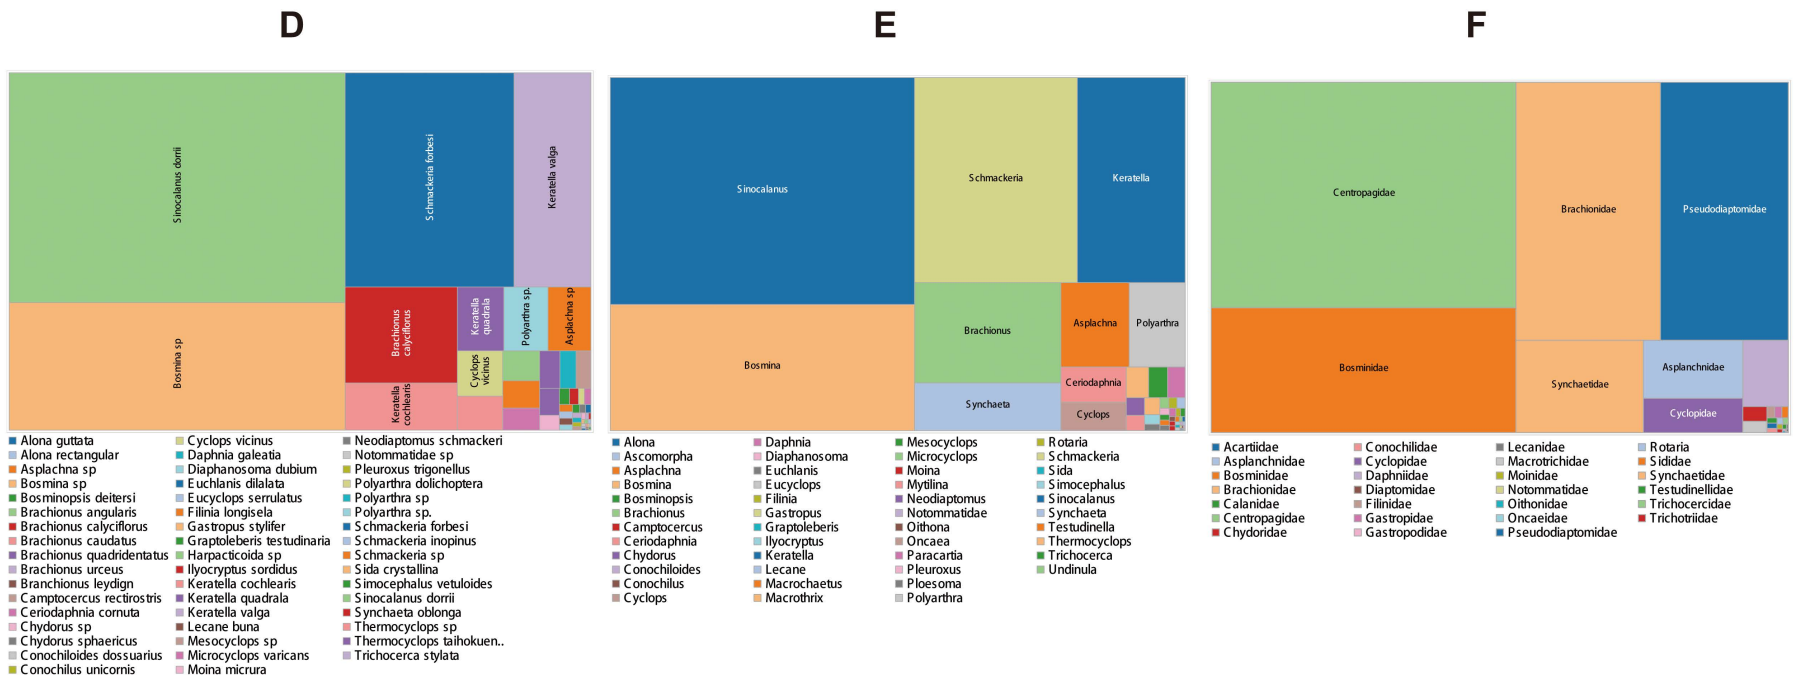

**Fig.S3.** The comparisons of metabarcoding data with traditional monitoring data in species, genus and family level, respectively. (A) species level; (B) genus level; (C) family level. Diagram D, E & F shows the sequence components of taxon that detected by both metabarcoding and traditional morphological method. (D) species level; (E) genus level; (F) family level.

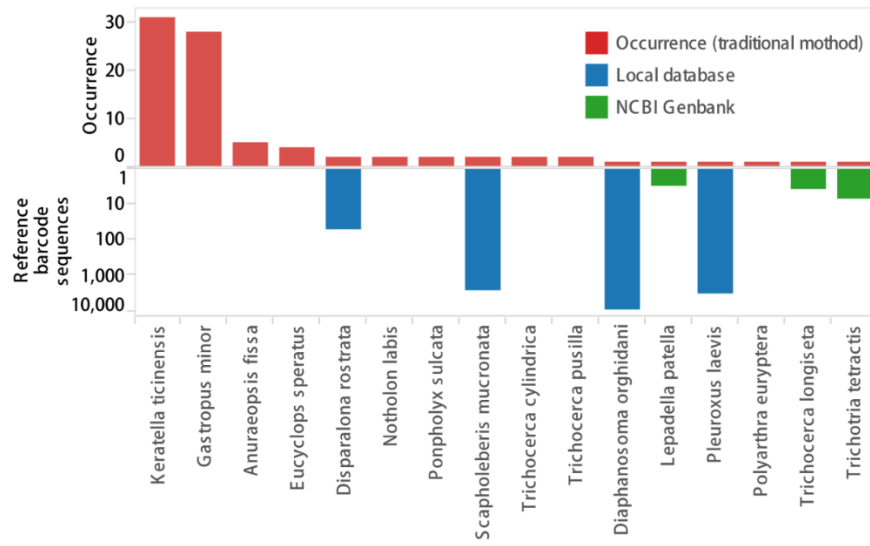

Fig.S4. Number of barcode sequences (CO1) in Genbank and local database of the missing species in metabarcoding data. The red bar represented the frequency of occurrence in traditional monitoring dataset. The green bar indicated the number of CO1 barcode sequence in Genbank.

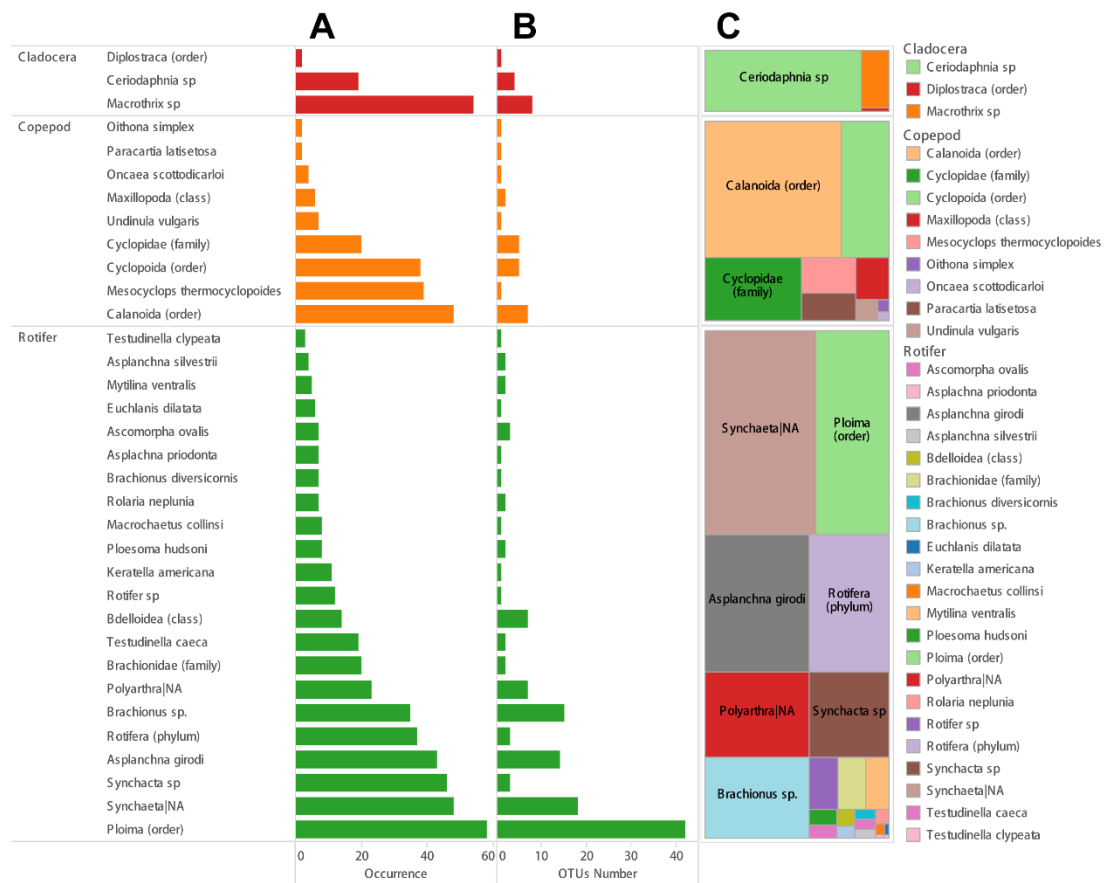

Fig.S5. The novel OTUs clusters/taxa detected by metabarcoding method. (A) the frequency of occurrence of each taxon. (B) the OTUs number of each taxon. (C) the reads composition of rotifer, cladocera and copepod.

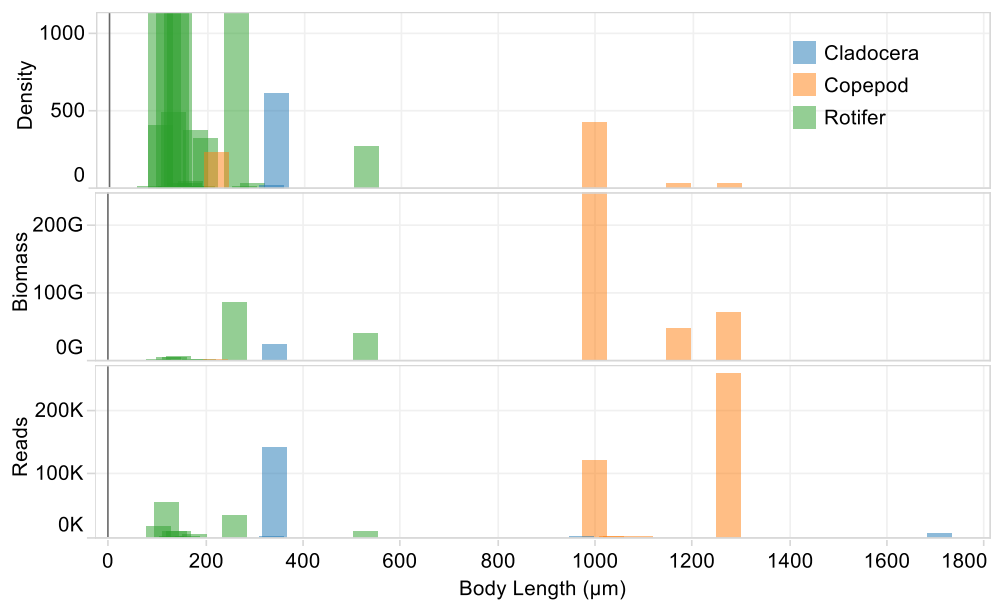

Fig.S6. The comparison results between zooplankton density, inferred biomass and the NGS reads number. The top histogram indicated the relationship between body length and density of zooplankton in traditional monitoring data. The middle histogram shows the relationship between body length and biomass of zooplankton in traditional monitoring data. The bottom histogram shows the relationship between body length and reads number in metabarcoding dataset. The biomass of zooplankton was roughly calculated by the density and body length (biomass = density  $\times$  bodylength<sup>3</sup>).

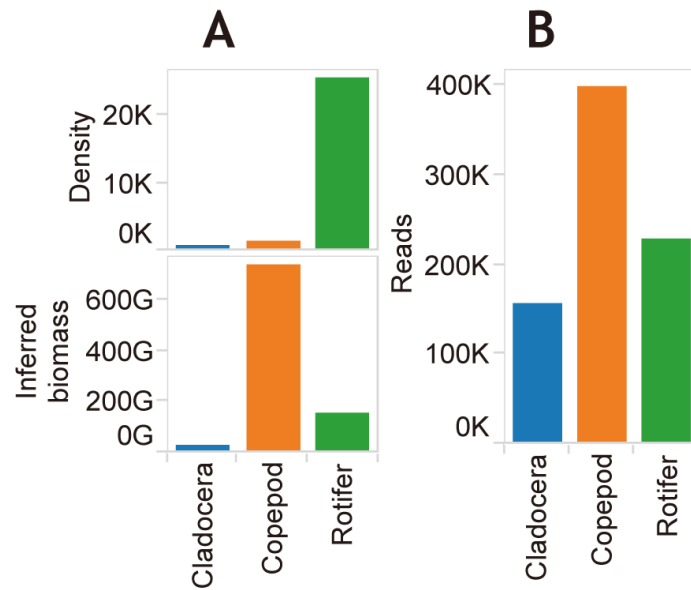

Fig.S7. The comparison results between zooplankton inferred biomass and the NGS reads number. (A) the top panel shows the density among three key group, rotifer, copepod and cladocera. The bottom panel shows the inferred biomass (calculate by bodysize and density) among three group. The inferred biomass of zooplankton was roughly estimated by the density and body length (biomass = density  $\times$  bodylength<sup>3</sup>). (B) The number of reads among rotifer, copepod and cladocera.
